# Supplementary material for: Cobalt ferrite supported on reduced graphene oxide as a T2 contrast agent for magnetic resonance imaging
Source: PubMed Central journal article supplement — RSC Adv. 2019 Feb 21;9(11):6299–309. doi: 10.1039/c8ra09476d (PMC9060952; doi:10.1039/c8ra09476d), 2019-02-21
Supplement: RA-009-C8RA09476D-s001.pdf [file RA-009-C8RA09476D-s001.pdf]

## Cobalt Ferrite Supported on Reduced Graphene Oxide as a T<sub>2</sub> Contrast Agent for Magnetic Resonance Imaging

Amira Alazmi<sup>a,d</sup>, Venkatesh Singaravelu<sup>b</sup>, Nitin M. Batra<sup>a</sup>, Jasmin Smajic<sup>a</sup>, Mram Alyami<sup>c</sup>, Niveen M. Khashab<sup>c</sup> and Pedro M. F. J. Costa<sup>a</sup>

<sup>a</sup>King Abdullah University of Science and Technology (KAUST), Physical Science and Engineering Division, Thuwal 23955-6900, Saudi Arabia; email: [amirh.aalazmy@kaust.edu.sa](mailto:amirh.aalazmy@kaust.edu.sa); [pedro.dacosta@kaust.edu.sa](mailto:pedro.dacosta@kaust.edu.sa).

<sup>b</sup>King Abdullah University of Science and Technology (KAUST), Core Labs, Thuwal, 23955-6900, Saudi Arabia

<sup>c</sup>Smart Hybrid Materials (SHMs) Laboratory, Advanced Membranes and Porous Materials Center, King Abdullah University of Science and Technology, Thuwal 23955-6900, Kingdom of Saudi Arabia

<sup>d</sup>University of Hafr Al Batin, University colleges at Nairiyah, Nairiyah, Saudi Arabia

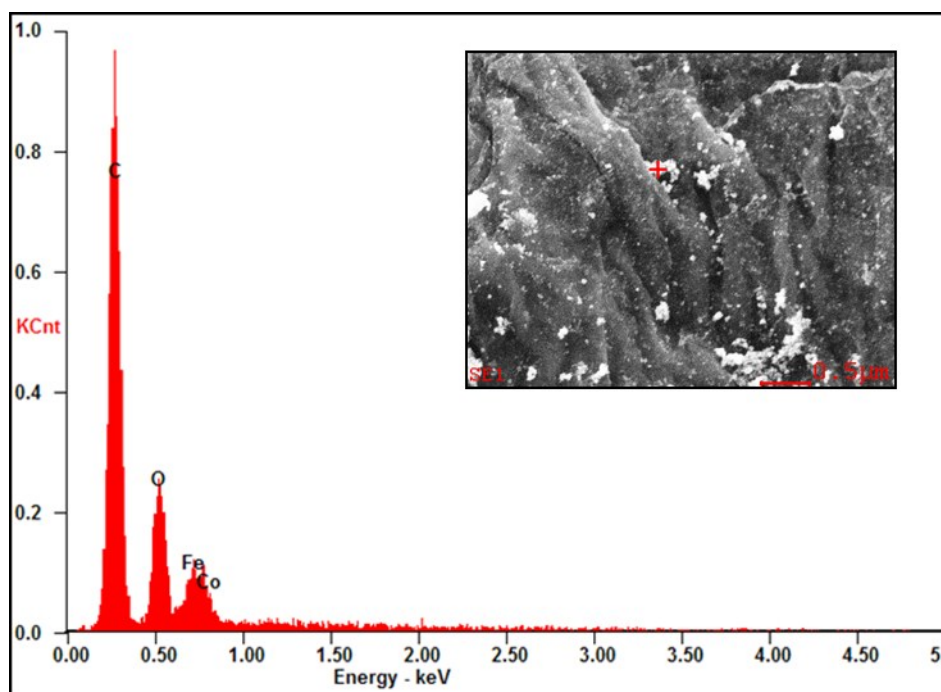

**Figure S11.** EDS analysis of a representative CoFe<sub>2</sub>O<sub>4</sub>-rGO composite (the corresponding SEM image and probe marker are inset).

**Table S11.** Concentration of Fe in the  $\text{CoFe}_2\text{O}_4$  nanoparticles and composites, as measured by ICP-OES.

| Sample                    | Fe (wt%) |
|---------------------------|----------|
| $\text{CoFe}_2\text{O}_4$ | 36.5     |
| rHGO- 5 %                 | 2        |
| rHGO – 10 %               | 3        |
| rHGO- 16 %                | 5        |
| rHGO -30 %                | 9        |
| rIGO- 5 %                 | 3        |
| rIGO – 10 %               | 4        |
| rIGO- 16 %                | 5        |
| rIGO -30 %                | 15       |

**Table S12.** Average particle size ( $D_{av}$ ) and respective standard deviation ( $\sigma$ ) for the  $\text{CoFe}_2\text{O}_4$  NPs,  $\text{CoFe}_2\text{O}_4$ -rHGO composites and  $\text{CoFe}_2\text{O}_4$ -rIGO composites (as estimated from TEM images).

| Sample                    | Particle size              |                            |
|---------------------------|----------------------------|----------------------------|
|                           | $D_{av}$ (nm) <sup>a</sup> | $\sigma$ (nm) <sup>b</sup> |
| $\text{CoFe}_2\text{O}_4$ | 12.3                       | 2.6                        |
| rHGO-5%                   | 3                          | 1                          |
| rHGO -10%                 | 3                          | 0.8                        |
| rHGO -16%                 | 4                          | 1                          |
| rHGO -30%                 | 7                          | 2                          |
| rIGO -5%                  | 5                          | 1                          |
| rIGO -10%                 | 7                          | 1                          |
| rIGO -16%                 | 9                          | 3                          |
| rIGO -30%                 | 12                         | 2                          |

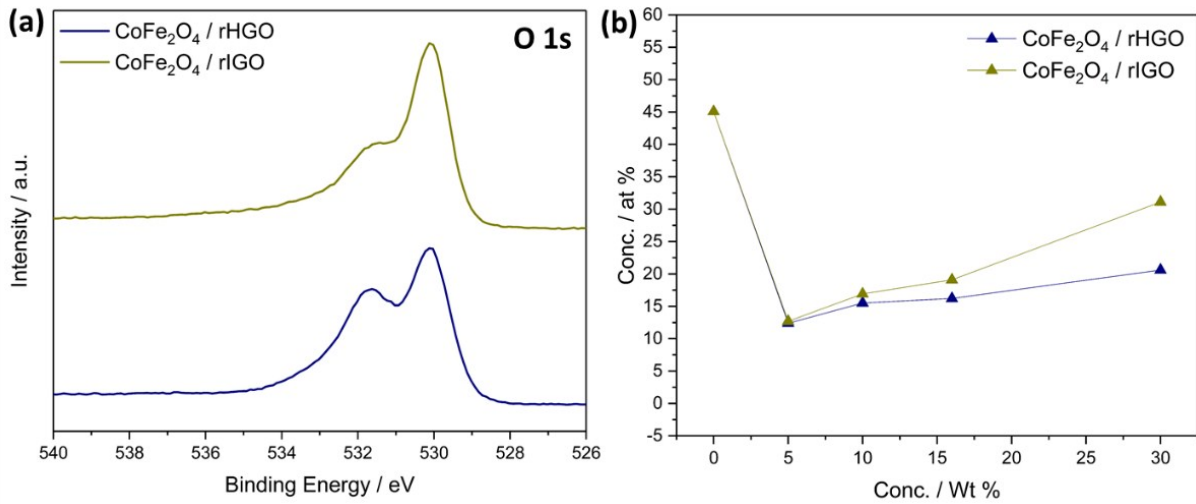

**Figure SI2.** (a) High-resolution O1s XPS spectra of the two 30% rGO composites; (b) Concentration of the surface oxygen atomic percentage as a function of the CoFe<sub>2</sub>O<sub>4</sub> loading (data extracted from the corresponding XPS spectra).

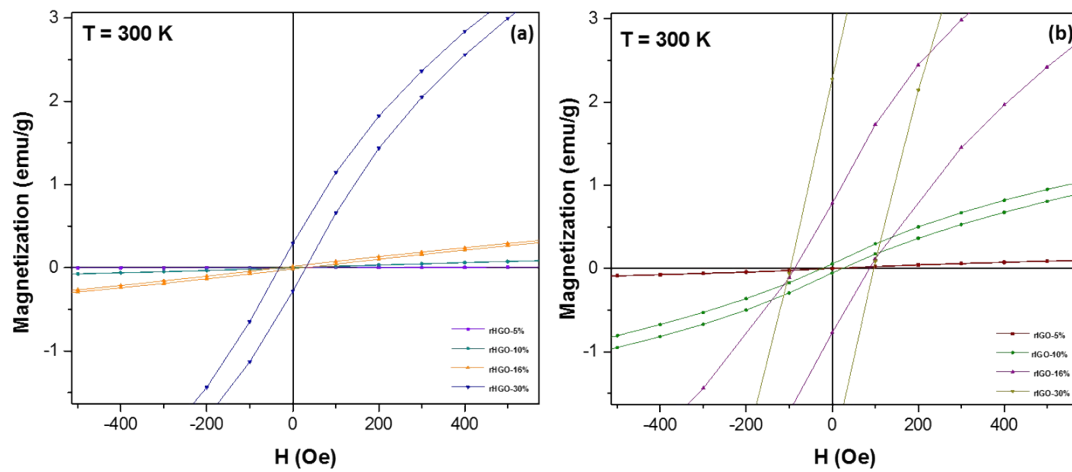

**Figure SI3.** Low-field regions of the hysteresis loops at room temperature for: (a) CoFe<sub>2</sub>O<sub>4</sub>-rHGO composites and (b) CoFe<sub>2</sub>O<sub>4</sub>-rIGO composites.

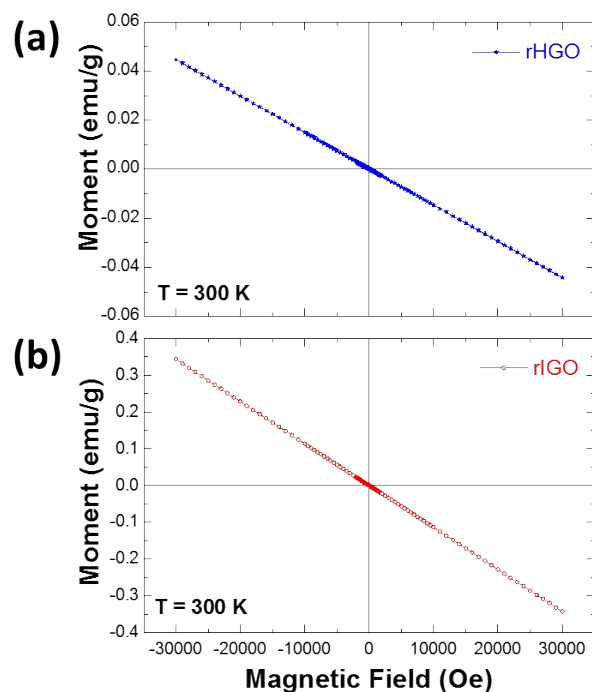

**Figure SI4.** Room temperature field-dependent magnetic measurements for: (a) rHGO and (b) rIGO.

**Table SI3.** Magnetization at 30000 Oe ( $M_{H=30000 \text{ Oe}}$ ), saturation magnetization ( $M_r$ ) and magnetic coercivity ( $H_c$ ) for the  $\text{CoFe}_2\text{O}_4$  nanoparticles,  $\text{CoFe}_2\text{O}_4$ -rHGO composites and  $\text{CoFe}_2\text{O}_4$ -rIGO composites (extracted from the M vs. H loops).

| CoFe <sub>2</sub> O <sub>4</sub><br>Loading wt% | CoFe <sub>2</sub> O <sub>4</sub> 5% |      | CoFe <sub>2</sub> O <sub>4</sub> 10% |       | CoFe <sub>2</sub> O <sub>4</sub> 16% |       | CoFe <sub>2</sub> O <sub>4</sub> 30% |       | CoFe <sub>2</sub> O <sub>4</sub> 100% |
|-------------------------------------------------|-------------------------------------|------|--------------------------------------|-------|--------------------------------------|-------|--------------------------------------|-------|---------------------------------------|
|                                                 | rHGO                                | rIGO | rHGO                                 | rIGO  | rHGO                                 | rIGO  | rHGO                                 | rIGO  |                                       |
| Composite                                       |                                     |      |                                      |       |                                      |       |                                      |       | -                                     |
| $M_{H=30000 \text{ Oe}}$<br>(emu/g)             | 0.08                                | 0.50 | 0.84                                 | 4.70  | 2.50                                 | 10.00 | 12.70                                | 24.71 | 55.51                                 |
| $M_r$ (emu/g)                                   | 0.00                                | 0.00 | 0.00                                 | 0.05  | 0.02                                 | 0.78  | 0.29                                 | 2.20  | 10.00                                 |
| $H_c$ (Oe)                                      | 18.00                               | 8.00 | 20.00                                | 23.00 | 28.00                                | 87.00 | 30.00                                | 97.00 | 199                                   |

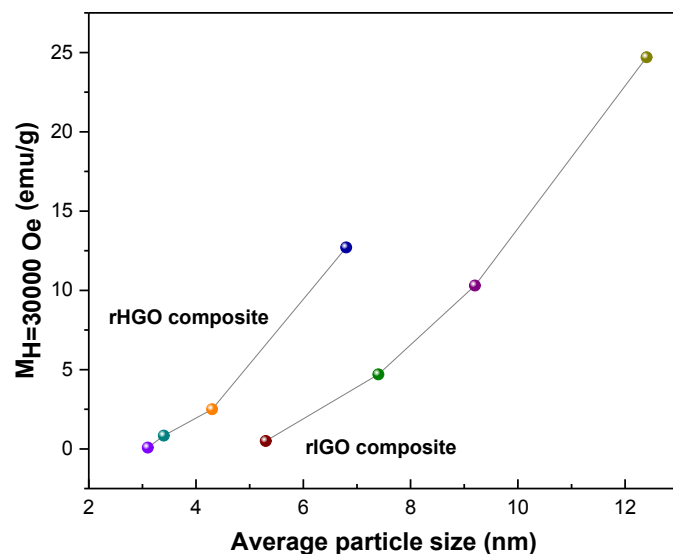

**Figure SI5.** Plot correlating the average particle size of  $\text{CoFe}_2\text{O}_4$  with magnetization at 30,000 Oe for the two sets of rGO composites studied.

**Table SI4.** Particle size, with corresponding  $r_2$  values, of two commercial contrast agents, two reported research samples and the present cobalt ferrite composites/nanoparticles.

| Material                             | Particle size (nm) | $r_2$ value ( $\text{mM}^{-1}\text{sec}^{-1}$ ) | Reference                                                                          |
|--------------------------------------|--------------------|-------------------------------------------------|------------------------------------------------------------------------------------|
| Feridex (Ferumoxides)                | 120-180            | 98.3                                            | Y.-X. J. Wang, Quantitative imaging in medicine and surgery, 2013, <b>3</b> , 1.   |
| Resovist (Ferucarbotran)             | 45-60              | 151.0                                           | Y.-X. J. Wang, Quantitative imaging in medicine and surgery, 2013, <b>3</b> , 1.   |
| Au- $\text{Fe}_3\text{O}_4$ dumbbell | 28                 | 114.0                                           | C. Xu, J. Xie, Angewandte Chemie International Edition, 2008, <b>47</b> , 173-176. |
| $\text{CoFe}_2\text{O}_4$ -GO        | 5-13               | 72.7                                            | G. Wang, Chemical Engineering Journal, 2016, <b>289</b> , 150-160.                 |
| $\text{CoFe}_2\text{O}_4$ -rHGO 30%  | 7 ( $\pm 2$ )      | 55.6                                            | This work                                                                          |
| $\text{CoFe}_2\text{O}_4$ -rIGO 30%  | 12 ( $\pm 2$ )     | 102.1                                           | This work                                                                          |
| $\text{CoFe}_2\text{O}_4$            | 12 ( $\pm 3$ )     | 112.4                                           | This work                                                                          |

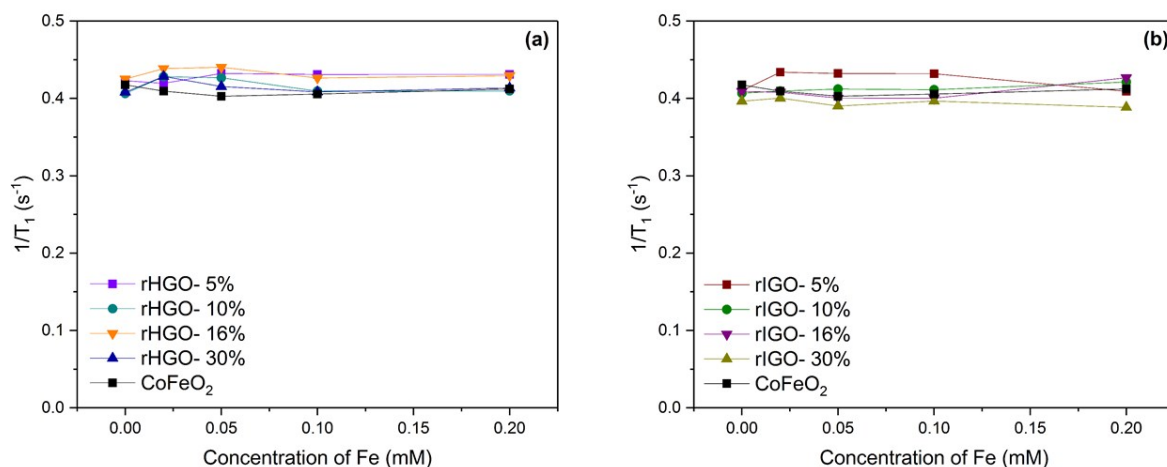

**Figure SI6.** Plot of the  $T_1$  relaxation rate ( $1/T_1$ ) for: (a)  $\text{CoFe}_2\text{O}_4$ -rHGO composites and pure  $\text{CoFe}_2\text{O}_4$ , (b)  $\text{CoFe}_2\text{O}_4$ -rIGO composites and pure  $\text{CoFe}_2\text{O}_4$ ; all samples were suspended in aqueous solution at different Fe concentrations.

**Table SI5.** Chronological evaluation of the  $\zeta$ -potentials for the 30 wt%  $\text{CoFe}_2\text{O}_4$ -rHGO and 30 wt%  $\text{CoFe}_2\text{O}_4$ -rIGO composites dispersed in aqueous PBS (samples measured at  $70 \mu\text{g mL}^{-1}$ ). Mean values and standard deviations obtained from triplicate measurements.

| Samples                                | $\zeta$ -potential in PBS (mV) |                  |                  |
|----------------------------------------|--------------------------------|------------------|------------------|
|                                        | 0 time                         | 10 hours         | 24 hours         |
| 30 wt% $\text{CoFe}_2\text{O}_4$ -rHGO | $-31.5 \pm 6.99$               | $-31.8 \pm 5.38$ | $-35.0 \pm 5.06$ |
| 30 wt% $\text{CoFe}_2\text{O}_4$ -rIGO | $-36.4 \pm 6.09$               | $-35.4 \pm 5.23$ | $-39.2 \pm 5.60$ |

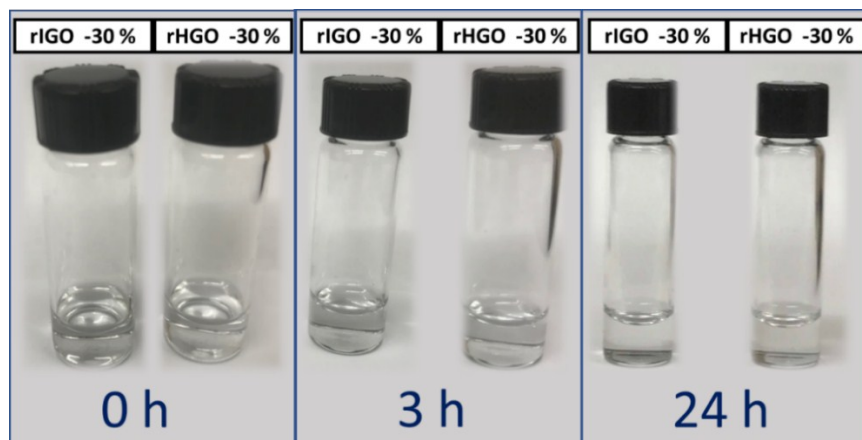

**Figure S17.** Photographs of 30 wt%  $\text{CoFe}_2\text{O}_4$ -rHGO and 30 wt%  $\text{CoFe}_2\text{O}_4$ -rIGO composites, dispersed at  $70 \mu\text{g mL}^{-1}$  in PBS, after various time points.

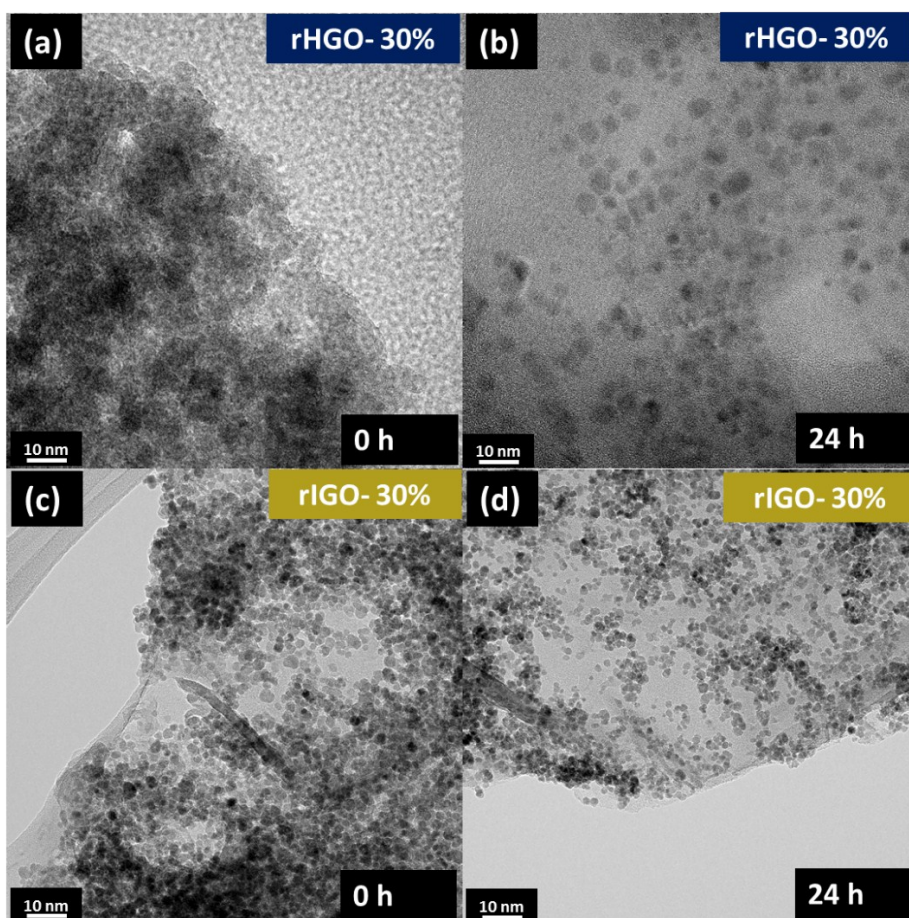

**Figure S18.** (a-b) TEM images of the 30 wt%  $\text{CoFe}_2\text{O}_4$ -rHGO in PBS after 0 h and 24 h, respectively; (c-d) TEM images of the 30 wt%  $\text{CoFe}_2\text{O}_4$ -rIGO in PBS after 0 h and 24 h, respectively.
